# Supplementary material for: Selenoprotein S Attenuates Tumor Necrosis Factor-α-Induced Dysfunction in Endothelial Cells
Source: Hindawi journal article supplement (doi:10.1155/2018/1625414), 2018-01-01
Supplement: f1 [file 1625414.f1.pdf]

# **Selenoprotein S Attenuates Tumor Necrosis Factor- $\alpha$ Induced Dysfunction in Endothelial Cells**

**Siyuan Cui<sup>1</sup>, Lili Men<sup>1</sup>, Yu Li<sup>1</sup>, Yingshuo Zhong<sup>1</sup>, Shanshan Yu<sup>1</sup>, Fang Li<sup>2</sup>, Jianling Du<sup>1</sup>**

<sup>1</sup> Department of Endocrinology, The First Affiliated Hospital of Dalian Medical University,  
Dalian 116000, Liaoning, China

<sup>2</sup> Department of Immunology, Dalian Medical University, Dalian 116000, Liaoning, China

The Corresponding authors' email: Fang Li, [lifang16@hotmail.com](mailto:lifang16@hotmail.com). Jianling Du, [dujianlingcn@163.com](mailto:dujianlingcn@163.com). Jianling Du is the first corresponding author.

**Disclosure statement:** The authors have nothing to disclose.

Table S1: the sequences of SelS siRNAs and Negative siRNA were shown.

| Designation    | Sequence                                                                                 |
|----------------|------------------------------------------------------------------------------------------|
| SelS siRNA 1   | sense strand 5'-CCACCUAUGGCUGGUACAUTT-3'<br>antisense strand 5'-AUGUACCAGCCAUAGGUGGTT-3' |
| SelS siRNA 2   | sense strand 5'-CCUUCUCUACGUGGUCUUUTT-3'<br>antisense strand 5'-AAAGACCACGUAGAGAAGGTT-3' |
| SelS siRNA 3   | sense strand 5'-GGAACCUGAUGUUGUUGUUTT-3'<br>antisense strand 5'-AACAACAACAUCAGGUUCCTT-3' |
| Negative siRNA | sense strand 5'-UUCUCCGAACGUGUCACGUTT-3'<br>antisense strand 5'-ACGUGACACGUUCGGAGAATT-3' |

Table S2: the specific primers for RT-qPCR were shown.

| Gene               | Sequences                                                     |
|--------------------|---------------------------------------------------------------|
| Human SelS         | 5'-GTTGCGTTGAATGATGTCTTCCT-3'<br>5'-AGAAACAAACCCCATCAACTGT-3' |
| Human GAPDH        | 5'-TGACCACAGTCCATGCCATCAC-3'<br>5'-CGCCTGCTTCACCACCTTCTT-3'   |
| Human eNOS         | 5'-CTGAAGGCTGGCATCTGGAA-3'<br>5'-CATGTTACTGTGCGTCCACTCTG-3'   |
| Human ET-1         | 5'-TCCTCTGCTGGTTCCTGACT-3'<br>5'-CAGAAACTCACCCCTGTGT-3'       |
| Human ICAM-1       | 5'-CAAGGTGACCGTGAATGTGC-3'<br>5'-CGTGGCTTGTGTGTTCGGTT-3'      |
| Human VCAM-1       | 5'-CCACATCTACGCTGACAATG-3'<br>5'-GAACACTTGACTGTGATCGG-3'      |
| Human IL-6         | 5'-TACATCCTCGACGGCATCTCA-3'<br>5'-GCCATCTTTGGAAGGTTCAAG-3'    |
| Human IL-1 $\beta$ | 5'-CCTGTCCTGCGTGTTGAAAG-3'<br>5'-GAGAGGTGCTGATGTACCAG-3'      |
| Human MCP-1        | 5'-GAAGAATCACCAGCAGCAAG-3'<br>5'-GAATCCTGAACCCACTTCTG-3'      |
| Human IL-8         | 5'-AGTTTTGCCAAGGAGTGCTA-3'<br>5'-AAAACCTTCTCCACAACCCTC-3'     |

Figure S1: the dissolve and amplification curves were shown in RT-qPCR experiments.

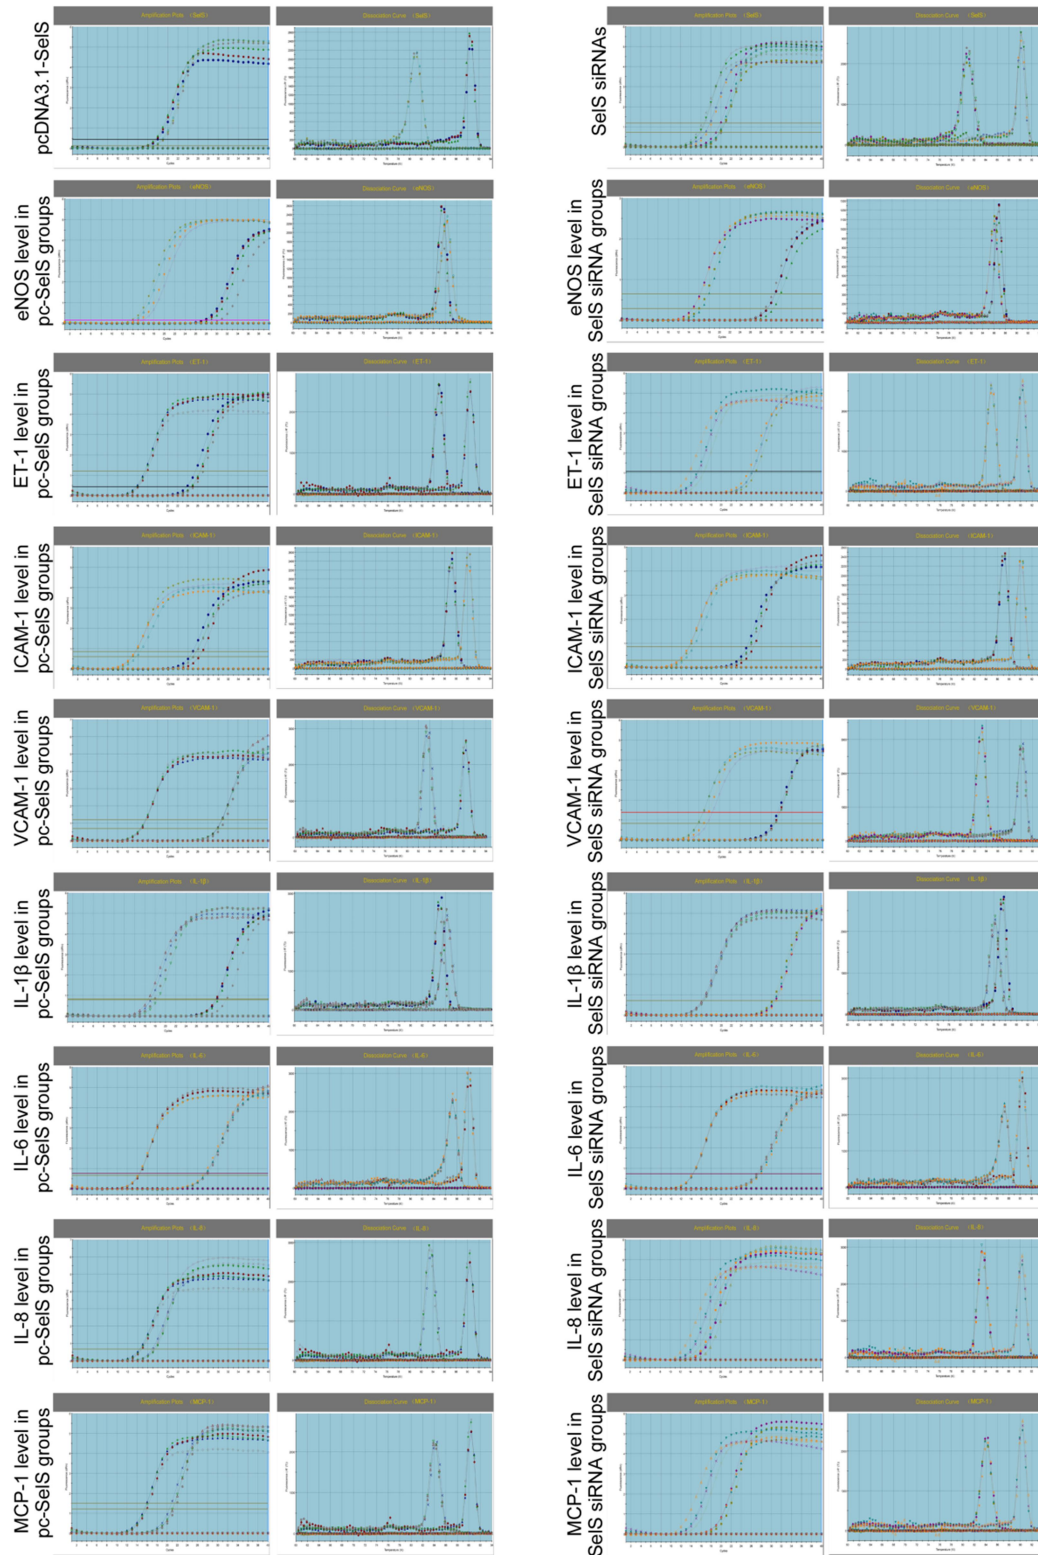

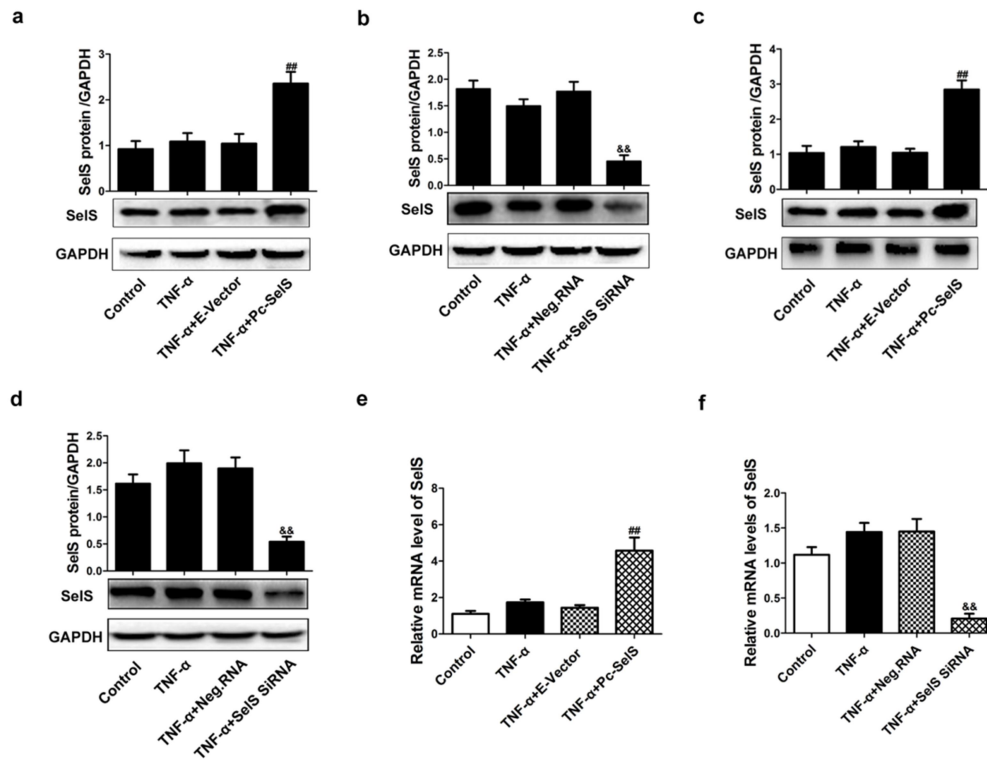

Figure S2: The transfection with pcDNA3.1-SelS recombinant plasmid or SelS siRNA was identified in Figure 3 listed experiments. (a) pcDNA3.1-SelS plasmid transfection and (b) SelS siRNA transfection using in cell viability experiment were determined by western blot. (c) The transfection with pc-SelS plasmid and (d) transfection with SelS siRNA using in NO measurement were tested by western blot. (e) The pc-SelS plasmid transfection or (f) SelS siRNA transfection in eNOS mRNA testing was determined by RT-qPCR.
